# Supplementary material for: Extracts ofHylotelephiumerythrostictum (miq.) H. Ohba ameliorate intestinal injury by scavenging ROS and inhibiting multiple signaling pathways in Drosophila
Source: PubMed Central journal article supplement (PMC11566468; doi:10.1186/s12906-024-04686-w), 2024-11-14
Supplement: 12906_2024_4686_MOESM1_ESM.pdf [file 12906_2024_4686_MOESM1_ESM.pdf]

1 Extracts of *Hylotelephium erythrostrictum* (Miq.) H. Ohba ameliorate intestinal injury by  
 2 scavenging ROS and inhibiting multiple signaling pathways in *Drosophila*

3

4 Hyonil Kim<sup>1,2</sup>, Xinyu Yi<sup>1</sup>, Hongmei Xue<sup>3</sup>, Guanhua Yue<sup>5</sup>, Jiahua Zhu<sup>5</sup>, Tongju Eh<sup>1,2</sup>,  
 5 Sihong Wang<sup>4\*</sup>, Li Hua Jin<sup>1\*</sup>

6

7 Supplemental information

8

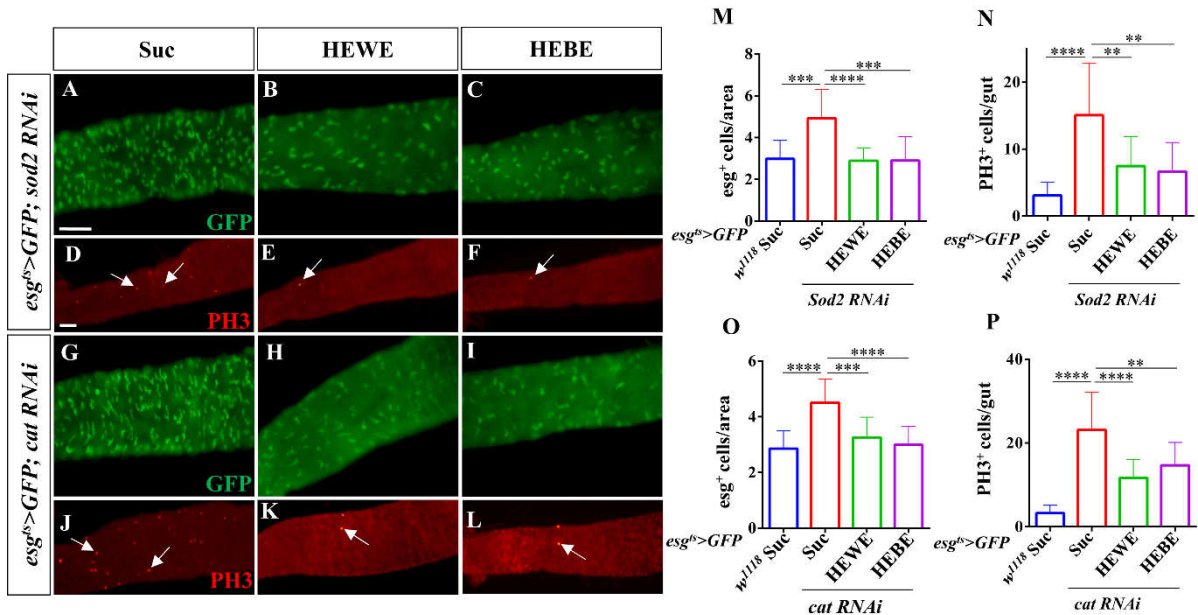

9

10 **Figure S1. Both HEWE and HEBE can reduce progenitor proliferation and**  
 11 **differentiation caused by the suppression of antioxidant enzymes.**

12 (A-L) Representative images of the midguts of *esg<sup>ts</sup>>GFP; sod2 RNAi* (A-F) and *esg<sup>ts</sup>>GFP;*  
 13 *cat RNAi* (G-L) transgenic flies at 29 °C for 7 days and stained with anti-GFP (A-C, G-I) and  
 14 anti-PH3 (D-F, J-L) antibodies. The *esg-Gal4/+* flies were used as controls. The numbers of  
 15 *esg<sup>ts</sup>* and PH3<sup>+</sup> cells were significantly greater in the *esg<sup>ts</sup>>GFP; sod2 RNAi* and *esg<sup>ts</sup>>GFP;*

16 *cat RNAi* groups than in the control group. After 4 days of supplementation with HEWE or  
 17 HEBE, the numbers of *esg*<sup>+</sup> and PH3<sup>+</sup> cells decreased significantly. (M-P) Quantification of  
 18 *esg*<sup>+</sup> cells (M, O) in the posterior midgut and PH3<sup>+</sup> cells (N, P) in the whole intestine from A-  
 19 L (n=12-18). Scale bars: 50 μm.

20

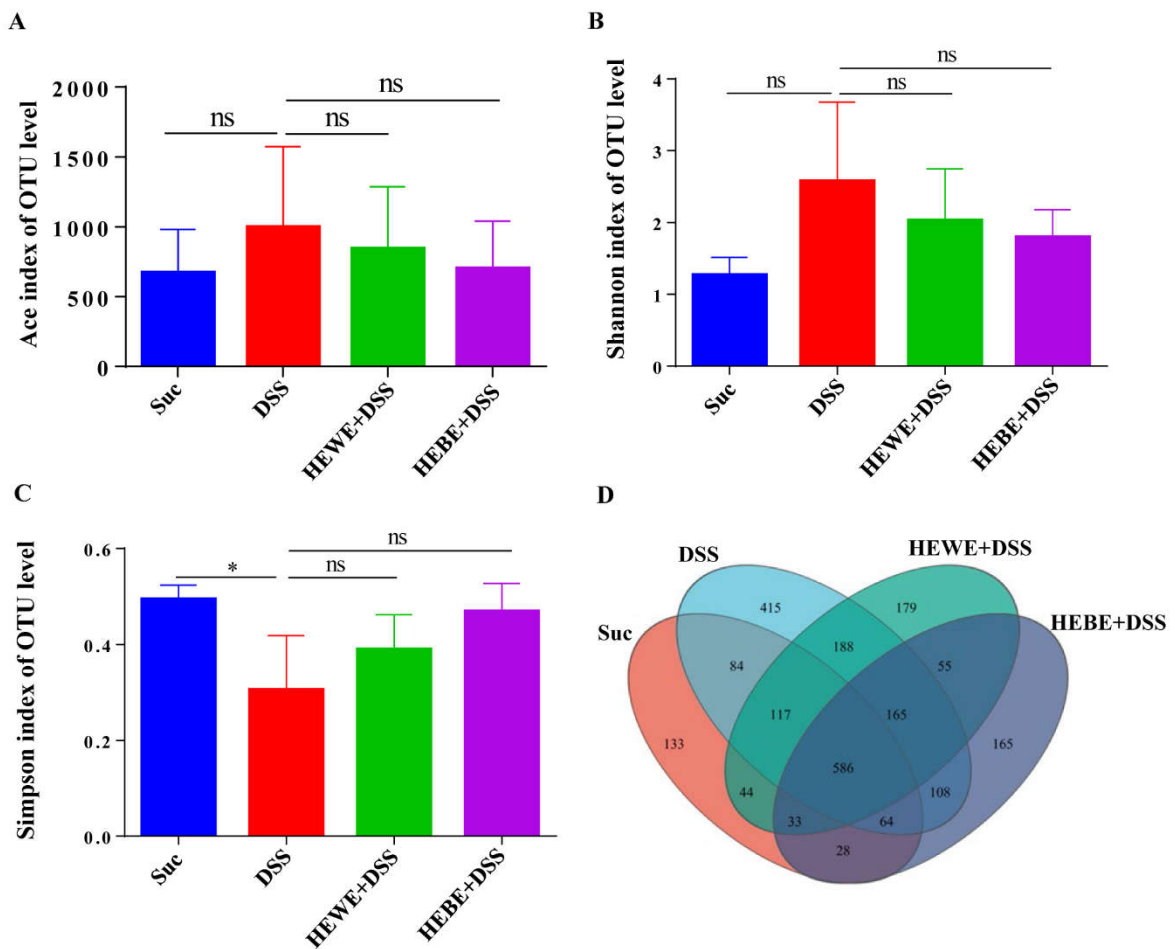

21

22 **Figure S2. Alpha diversity and Venn diagram of gut microbiota.**

23 (A-C) Alpha diversity bar charts (Ace, Shannon, and Simpson indices) for each group (n=3).

24 (D) Venn diagram showing OTU overlaps between each group.

25

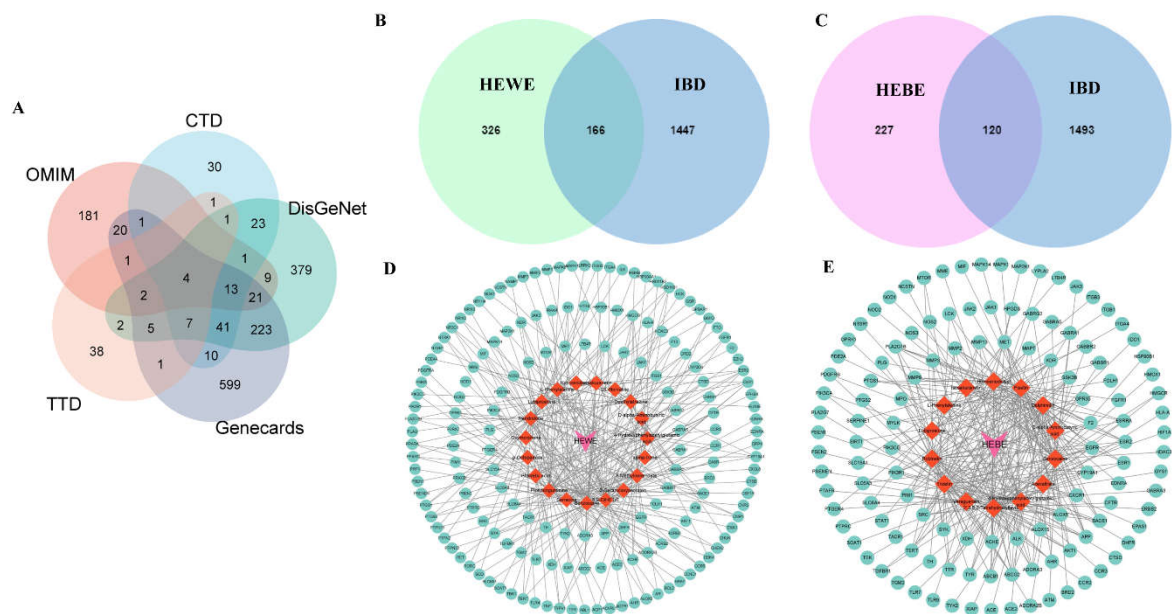

26

27 **Figure S3. Key compounds and targets of HEWE and HEBE for the treatment of IBD.**

28 (A) Venn diagrams of IBD targets from 5 databases. (B) Intersection of identified targets of  
 29 HEWE and IBD. (C) Intersection of identified targets of HEBE and IBD. (D, E) Network of  
 30 herb-compound–target interactions. The red diamonds are the compounds of HEWE and HEBE,  
 31 and the green circles around them are the targets.

32 **Table S1. Bioactive compounds of HEWE.**

| No | Compound name                         | PubChem<br>CID | Class                                     | GI<br>absorption | DL  |
|----|---------------------------------------|----------------|-------------------------------------------|------------------|-----|
| 1  | DL-Norvaline                          | 824            | Amino acid and<br>derivatives             | High             | Yes |
| 2  | Deethylatrazine                       | 22563          | Triazines                                 | High             | Yes |
| 3  | D-alpha-Aminobutyric acid             | 439691         | Carboxylic acids<br>and derivatives       | High             | Yes |
| 4  | 4-Hydroxyphenylacetylglutamic<br>acid | 440731         | Glutamic acid and<br>derivatives          | High             | Yes |
| 5  | alpha-Irone                           | 5371002        | Prenol lipids                             | High             | Yes |
| 6  | 8-Methylnonenoate                     | 5365959        | Fatty Acyls                               | High             | Yes |
| 7  | 8-Geranyloxypsoralen                  | 5317564        | Coumarins                                 | High             | Yes |
| 8  | 8,9-DiHETrE                           | 3246873        | Fatty Acyls                               | High             | Yes |
| 9  | Benzocaine                            | 2337           | Benzene and<br>substituted<br>derivatives | High             | Yes |
| 10 | Sarracine                             | 5281746        | Alkaloids                                 | High             | Yes |
| 11 | Piperlonguminine                      | 5320621        | Alkaloids                                 | High             | Yes |
| 12 | Phloretic acid                        | 10394          | Phenols                                   | High             | Yes |
| 13 | p-Octopamine                          | 4581           | Phenols                                   | High             | Yes |
| 14 | Oxymorphone                           | 5284604        | Phenanthrenes and<br>derivatives          | High             | Yes |
| 15 | Nandrolone                            | 9904           | Steroids and steroid<br>derivatives       | High             | Yes |
| 16 | Lubiprostone                          | 157920         | Fatty Acyls                               | High             | Yes |
| 17 | L-Phenylalanine                       | 6140           | Amino acid and<br>derivatives             | High             | Yes |
| 18 | Kynurenic acid                        | 3845           | Alkaloids                                 | High             | Yes |
| 19 | Isosakuranetin                        | 160481         | Flavonoids                                | High             | Yes |

33

34 **Table S2. Bioactive compounds of HEBE.**

| No | Compound name                         | PubChem<br>CID | Class                                     | GI<br>absorption | DL  |
|----|---------------------------------------|----------------|-------------------------------------------|------------------|-----|
| 1  | Homoeriodictyol                       | 73635          | Flavonoids                                | High             | Yes |
| 2  | Fisetin,                              | 5281614        | Flavonoids                                | High             | Yes |
| 3  | Delphinidin                           | 68245          | Flavonoids                                | High             | Yes |
| 4  | D-alpha-Aminobutyric acid             | 439691         | Carboxylic acids and<br>derivatives       | High             | Yes |
| 5  | Benzocaine                            | 2337           | Benzene and<br>substituted<br>derivatives | High             | Yes |
| 6  | Acevaltrate                           | 65717          | Iridoids                                  | High             | Yes |
| 7  | 4-Hydroxyphenylacetylglutamic<br>acid | 440731         | Glutamic acid and<br>derivatives          | High             | Yes |
| 8  | 2',3,5,7-Tetrahydroxyflavon           | 5281610        | Flavonoids                                | High             | Yes |
| 9  | Veraguensin                           | 443026         | Lignans                                   | High             | Yes |
| 10 | Tricetin                              | 5281701        | Flavonoids                                | High             | Yes |
| 11 | Robinetin                             | 5281692        | Flavonoids                                | High             | Yes |
| 12 | Lubiprostone                          | 157920         | Fatty Acyls                               | High             | Yes |
| 13 | L-Phenylalanine                       | 6140           | Amino acid and<br>derivatives             | High             | Yes |
| 14 | Isosakuranetin                        | 160481         | Flavonoids                                | High             | Yes |

35

36 There are no Gels and Blots images in this study. Therefore, we did not provide the full  
37 uncropped Gels and Blots images.
